# Supplementary material for: Spatial And Temporal Trends Of Organic Pollutants In Vegetation From Remote And Rural Areas
Source: PubMed Central journal article supplement (PMC4857197; doi:10.1038/srep25446), 2016-05-05
Supplement: srep25446-s1.pdf [file srep25446-s1.pdf]

1 **SUPPLEMENTARY MATERIALS:**

2

3

4 **SPATIAL AND TEMPORAL TRENDS OF ORGANIC POLLUTANTS IN**

5 **VEGETATION FROM REMOTE AND RURAL AREAS**

6

7 **Short title:** Global distribution of POPs in vegetation

8 **Authors:** Mireia Bartrons,<sup>1,2\*</sup> Jordi Catalan,<sup>3</sup> Josep Penuelas<sup>1,3</sup>

9

10 **Affiliations:**

11 <sup>1</sup> CSIC, Global Ecology Unit CREAM-CSIC-UAB. Cerdanyola del Vallès 08193,

12 Barcelona, Catalonia, Spain.

13 <sup>2</sup> BETA Technological Centre (Tecnio), Aquatic Ecology Group, University of Vic–

14 Central University of Catalonia. Vic 08500, Barcelona, Catalonia, Spain.

15 <sup>3</sup> CREAM. Cerdanyola del Vallès 08193, Barcelona, Catalonia, Spain.

16

17 \*Corresponding author: [mireia.bartrons@uvic.cat](mailto:mireia.bartrons@uvic.cat).

18

19 **Table S1.** Classification of the persistent organic pollutants (POPs) and polycyclic  
 20 aromatic hydrocarbons (PAHs) in this study. Phen –Phenanthrene, Ant – Anthracene, Ftn –  
 21 Fluoranthene, Pyr – Pyrene, BaA – Benz[a]anthracene, Ch – Chrysene, BbF –  
 22 Benzo[b]fluoranthene, BkF – Benzo[k] fluoranthene, B[a]P – Benzo[a]pyrene.  
 23

| Use           | POP                                                        | LogK <sub>OA</sub>          | LogK <sub>OW</sub> |       |      |
|---------------|------------------------------------------------------------|-----------------------------|--------------------|-------|------|
| Intentional   | Fungicide and combustion byproduct of chlorinated organics | HCB                         | 7.21               | 5.64  |      |
|               |                                                            | Insecticides                | HCHs               |       |      |
|               |                                                            |                             | α-HCH              | 7.46  | 3.94 |
|               | γ-HCH                                                      |                             | 7.74               | 3.83  |      |
|               | Insecticides                                               | DDTs                        |                    |       |      |
|               |                                                            | p,p'-DDE                    | 9.70               | 4.20  |      |
|               |                                                            | p-p'-DDT                    | 9.73               | 6.39  |      |
|               |                                                            | PCBs                        |                    |       |      |
|               | Industrial, dielectric/hydraulic fluid                     | PCB28                       |                    | 5.71  |      |
|               |                                                            | PCB52                       | 7.82               | 5.79  |      |
|               |                                                            | PCB101                      | 8.24               | 6.40  |      |
|               |                                                            | PCB118                      | 9.82               | 6.57  |      |
|               |                                                            | PCB138                      | 9.06               | 6.70  |      |
|               |                                                            | PCB153                      | 9.55               | 6.80  |      |
|               |                                                            | PCB180                      | 10.20              | 7.21  |      |
|               |                                                            | Industrial, flame retardant | PBDEs              |       |      |
|               |                                                            |                             | BDE47              | 10.53 | 6.55 |
|               |                                                            |                             | BDE99              | 11.31 | 7.13 |
|               |                                                            |                             | BDE183             | 11.96 | 8.10 |
| BDE209        | 15.27                                                      |                             | 9.97               |       |      |
| Unintentional | Forest fires and geochemical processes                     | PAHs                        |                    |       |      |
|               |                                                            | Phen                        | 7.68               | 4.57  |      |
|               |                                                            | Ant                         | 7.71               | 4.45  |      |
|               |                                                            | Ftn                         | 8.76               | 5.22  |      |
|               |                                                            | Pyr                         | 8.93               | 5.18  |      |
|               |                                                            | BaA                         | 10.28              | 5.79  |      |
|               |                                                            | Ch                          | 10.3               | 5.73  |      |
|               |                                                            | BbF                         | 11.34              | 6.11  |      |
|               |                                                            | BkF                         | 11.37              | 6.11  |      |
|               |                                                            | BaP                         | 11.56              | 6.13  |      |

Sources: Harner and Shoeib <sup>1</sup>, Tittlemier, et al. <sup>2</sup>, Wania and Dugani <sup>3</sup>, Xiao, et al. <sup>4</sup>, Veltman, et al. <sup>5</sup>, Mackay, et al. <sup>6</sup>, Odabasi, et al. <sup>7</sup>, and Daly, et al. <sup>8</sup>, Finizio, et al. <sup>9</sup>, Makino <sup>10</sup>, Shiu and Ma <sup>11</sup>

24 **Table S2.** Plant types, common names, scientific names (when available), and POP  
 25 concentrations (mean  $\pm$  standard deviation in ng·g<sup>-1</sup> dry weight) from the data presented  
 26 in this study.

| Group                                  | Common name  | Species                                                                                                                                                                                                                                                                                                                                                                                                                            | N       | HCB             | $\Sigma$ HCHs     | $\Sigma$ DDTs     | $\Sigma$ PCBs     | $\Sigma$ PBDEs                         | $\Sigma$ PAHs      |
|----------------------------------------|--------------|------------------------------------------------------------------------------------------------------------------------------------------------------------------------------------------------------------------------------------------------------------------------------------------------------------------------------------------------------------------------------------------------------------------------------------|---------|-----------------|-------------------|-------------------|-------------------|----------------------------------------|--------------------|
| Lichen (plant-like composite organism) | lichen       | <i>Lecanora aspidophora</i> ,<br><i>Stereocaulon glabrum</i> , <i>Umbilicaria</i> spp., <i>Umbilicaria propagulifera</i> , <i>Usnea sulphurea</i> , <i>Hypogymnia physodes</i> , <i>Parmotrema hypoleucinum</i> , <i>Usnea</i> spp., <i>Usnea antarctica</i> , <i>Usnea aurantiaco-atra</i>                                                                                                                                        | 59      | 2.59 $\pm$ 3.36 | 42.73 $\pm$ 56.57 | 6.33 $\pm$ 7.98   | 28.86 $\pm$ 33.04 | 0.17 $\pm$ 0.06                        | 641.7 $\pm$ 772.1  |
| Bryophyta                              | moss         | <i>Andreaea regularis</i> ,<br><i>Bryum algens</i> ,<br><i>Drepanocladus uncinatus</i> ,<br><i>Brachytecyum</i> sp.,<br><i>Hylocomium splendens</i> , <i>Pleurozium schreberi</i> , <i>Hypnum cupressiforme</i> , <i>H. plumaeformae</i> ,<br><i>Isopterygium minutirameum</i> ,<br><i>Sanionia uncinata</i> ,<br><i>Sphagnum</i> spp.,<br><i>Sytrichia princeps</i>                                                               | 213     | 1.97 $\pm$ 3.92 | 15.41 $\pm$ 24.71 | 2.73 $\pm$ 3.75   | 19.80 $\pm$ 20.38 | 1.23 $\pm$ 1.41                        | 761.2 $\pm$ 847.8  |
| Lichen & moss                          |              |                                                                                                                                                                                                                                                                                                                                                                                                                                    | 15      | 0.41 $\pm$ 0.39 | 10.74 $\pm$ 13.87 | 9.52 $\pm$ 16.46  |                   |                                        |                    |
| Gymnosperm                             | cedar        | <i>Cedrus deodara</i> ,<br><i>Juniperus virginiana</i>                                                                                                                                                                                                                                                                                                                                                                             | 30      | 1.16 $\pm$ 1.59 | 0.27 $\pm$ 0.23   | 2.88 $\pm$ 2.83   | 15.90 $\pm$ 12.68 | 2.79 $\pm$ 2.21                        |                    |
|                                        | cypress      | <i>Cupressus torulosa</i>                                                                                                                                                                                                                                                                                                                                                                                                          | 4       | 1.03 $\pm$ 0.02 | 3.34 $\pm$ 0.92   | 11.17 $\pm$ 0.96  |                   |                                        |                    |
|                                        | larch        | <i>Larix decidua</i>                                                                                                                                                                                                                                                                                                                                                                                                               | 5       | 0.61            | 0.34              |                   | 2.18 $\pm$ 1.25   |                                        |                    |
|                                        | pine         | <i>Pinus canariensis</i> , <i>P. densata</i> , <i>P. densiflora</i> ,<br><i>P. halepensis</i> , <i>P. koraiensis</i> , <i>P. massoniana</i> , <i>P. tabulaeformis</i> , <i>P. maximartinezii</i> , <i>P. nigra</i> , <i>P. pinaster</i> , <i>P. pinea</i> , <i>P. strobus</i> , <i>P. sylvestris</i> (N = 388),<br><i>P. tabulaeformis</i> , <i>P. taeda</i> , <i>P. thunbergii</i> ,<br><i>P. uncinata</i> , <i>P. virginiana</i> | 727     | 1.82 $\pm$ 1.52 | 14.58 $\pm$ 15.94 | 2.72 $\pm$ 8.38   | 19.65 $\pm$ 32.91 | 267.7 $\pm$ 1035.3                     | 542.3 $\pm$ 1120.8 |
|                                        | spruce       | <i>Picea abies</i> , <i>Tsuga dumosa</i>                                                                                                                                                                                                                                                                                                                                                                                           | 47      | 0.89 $\pm$ 0.50 | 3.03 $\pm$ 2.93   | 7.93 $\pm$ 11.91  | 31.58 $\pm$ 164.9 | 2.11                                   | 97.42 $\pm$ 123.3  |
| Angiosperm                             | ash          | <i>Fraxinus excelsior</i> ,<br><i>Sorbus aucuparia</i>                                                                                                                                                                                                                                                                                                                                                                             | 13      |                 |                   |                   | 1.71 $\pm$ 0.69   |                                        | 242.10             |
|                                        | beech        | <i>Fagus sylvatica</i>                                                                                                                                                                                                                                                                                                                                                                                                             | 6       | 0.19            | 0.36              |                   | 1.84 $\pm$ 1.17   |                                        |                    |
|                                        | camphor tree | <i>Cinnamomum camphora</i><br><i>Cinnamomum camphora</i> , <i>Buxus</i> sp.                                                                                                                                                                                                                                                                                                                                                        | 49<br>3 |                 |                   |                   |                   | 19.32 $\pm$ 57.24<br>29.79 $\pm$ 24.31 |                    |
|                                        | chestnut     | <i>Castanea sativa</i>                                                                                                                                                                                                                                                                                                                                                                                                             | 5       | 0.21            | 0.24              |                   | 1.98 $\pm$ 0.94   |                                        |                    |
|                                        | elm          | <i>Ulmus</i> spp.                                                                                                                                                                                                                                                                                                                                                                                                                  | 3       |                 |                   |                   |                   | 57.45 $\pm$ 83.47                      |                    |
|                                        | eucalyptus   | <i>Eucalyptus</i> spp.                                                                                                                                                                                                                                                                                                                                                                                                             | 1       |                 |                   |                   |                   | 33.83                                  |                    |
|                                        | grass        | <i>Deschampsia antarctica</i> , Poaceae                                                                                                                                                                                                                                                                                                                                                                                            | 69      | 0.14 $\pm$ 0.08 |                   | 0.08 $\pm$ 0.03   | 0.33 $\pm$ 0.30   | 1.55 $\pm$ 1.95                        | 7.72 $\pm$ 2.86    |
|                                        | hazelnut     | <i>Corylus avellana</i>                                                                                                                                                                                                                                                                                                                                                                                                            | 7       | 0.04            | 0.09              |                   | 1.56 $\pm$ 0.72   |                                        | 577.5              |
|                                        | lime         | <i>Tilia cordata</i>                                                                                                                                                                                                                                                                                                                                                                                                               | 4       |                 |                   |                   | 1.71 $\pm$ 0.94   |                                        |                    |
|                                        | mango        | <i>Mangifera indica</i>                                                                                                                                                                                                                                                                                                                                                                                                            | 10      | 0.11 $\pm$ 0.01 | 13.52 $\pm$ 37.58 | 24.30 $\pm$ 30.24 |                   |                                        |                    |
|                                        | maple        | <i>Acer pseudoplatanus</i> ,<br><i>A. saccharum</i>                                                                                                                                                                                                                                                                                                                                                                                | 39      | 0.06            | 0.21              |                   | 1.46 $\pm$ 0.90   |                                        | 766.7 $\pm$ 758.1  |

|                                       |                                                            |    |             |         |             |              |               |               |
|---------------------------------------|------------------------------------------------------------|----|-------------|---------|-------------|--------------|---------------|---------------|
| oak                                   | <i>Quercus</i> spp., <i>Q. mongolica</i> , <i>Q. robur</i> | 19 |             |         |             |              | 571.1 ± 661.8 | 283.20        |
| poplar                                | <i>Populus</i>                                             | 1  |             |         |             |              | 101.5         |               |
| olive                                 | <i>Olea europaea</i>                                       | 7  | 31 ± 16     | 91 ± 52 | 81 ± 63     | 255 ± 166    |               |               |
| corn                                  | <i>Zea mays</i>                                            | 30 |             |         |             |              |               | 26.52 ± 11.85 |
| oak, cherry tree, hornbeam, alderwood |                                                            | 1  | 0.33        | 81.20   | 103.90      |              |               |               |
| ashwood                               |                                                            |    |             |         |             |              |               |               |
| pearlwort                             | <i>Colobanthus quitensis</i>                               | 3  | 0.53 ± 0.69 | 1.05    | 0.08 ± 0.04 | 7.31 ± 10.17 | 0.28          | 9.52          |

27 Sources: Lichen<sup>12-21</sup>; Bryophyta<sup>13,15,17-19,21-39</sup>; Lichen and moss<sup>16</sup>; Cedar<sup>40,41</sup>; Cypress  
28 <sup>42</sup>; Larch<sup>43,44</sup>; Pine<sup>12,19,20,27,28,41,42,45-79</sup>; Spruce<sup>42-44,57,80-84</sup>; Ash<sup>43,85</sup>; Beech<sup>43,44</sup>;  
29 Camphor tree<sup>86,87</sup>; Chestnut<sup>43,44</sup>; Elm<sup>79</sup>; Eucalyptus<sup>68</sup>; Grass<sup>15,88,89</sup>; Hazelnut<sup>43,85</sup>;  
30 Lime<sup>43</sup>; Mango<sup>16</sup>; Maple<sup>43,44,72</sup>; Oak<sup>49,79,85</sup>; Olive<sup>90</sup>; Poplar<sup>79</sup>; Corn<sup>72</sup>; Oak, cherry  
31 tree, hornbeam, alderwood and ashwood<sup>36</sup>; Pearlwort<sup>15,18,21</sup>  
32

33 **Table S3.** Multilevel model of the effects of abiotic and biotic variables on the  
34 concentrations of POPs in plants. Constant and varying effects by congeners are included  
35 for the predictor variables included in the lowest-AIC models. All models accounted for  
36 spatial correlation structure and nugget (which were significant in all cases,  $P < 0.001$ ) and  
37 were run using the restricted maximum likelihood criterion for optimizing parameter  
38 estimates. MAT, mean annual temperature; MAP, mean annual precipitation. • $P < 0.1$ , \* $P$   
39  $< 0.05$ , \*\* $P < 0.01$ , \*\*\* $P < 0.001$

40  
41

|                                    | HCb<br>(N = 419) | HCHs<br>(N = 830) |         | DDTs<br>(N = 754) | PCBs<br>(N = 72) |         | PBDEs<br>(N = 188) |         | PAHs<br>(N = 648) |         |
|------------------------------------|------------------|-------------------|---------|-------------------|------------------|---------|--------------------|---------|-------------------|---------|
|                                    | Fixed            | Fixed             | Random  | Fixed             | Fixed            | Random  | Fixed              | Random  | Fixed             | Random  |
| Year                               | -0.35***         | -0.70***          |         | 0.44              | -0.28***         | 0.05*   |                    |         | 0.24***           |         |
| Latitude                           |                  |                   |         |                   | -0.17***         |         |                    |         |                   |         |
| Altitude                           |                  |                   |         |                   | 0.15**           |         |                    |         |                   |         |
| MAT                                |                  | 0.18*             |         | -0.10*            | 0.02             |         | 0.28*              |         | 0.43***           |         |
| MAP                                |                  |                   |         |                   | -0.11***         |         |                    |         |                   |         |
| Group, lichen                      | 0.44*            |                   |         |                   |                  |         |                    |         | -0.19             | 0.33*** |
| Group, Bryophyta                   | 0.17             |                   |         |                   | 0.98***          |         |                    |         | -0.75*            | 0.25*** |
| Group, gymnosperm                  | 0.39**           |                   |         |                   | -0.04            |         |                    |         | -0.75*            | 0.48*** |
| Group, angiosperm                  |                  |                   |         |                   |                  |         |                    |         |                   |         |
| Continent, North America           |                  |                   |         |                   |                  | 0.42*** |                    | 0.74*** |                   |         |
| Continent, Central & South America |                  |                   | 0.43*** |                   |                  |         |                    |         |                   |         |
| Continent, Europe                  | 0.70***          | 1.14*             | 0.02*** |                   | 1.26***          | 0.13*** | -0.21              | 0.54*** |                   |         |
| Continent, Africa                  | 0.06             | -0.25             | 0.15*** |                   |                  |         |                    |         |                   |         |
| Continent, Asia                    | 0.96***          | 1.97***           | 0.19*** |                   |                  |         | -0.58              | 0.61*** |                   |         |
| Land use, rural                    | -0.89***         | 0.14*             |         | -1.21**           | 0.03             |         |                    |         | 0.18*             |         |
| Year:rural                         | -0.59***         | 0.25***           |         | -1.21***          |                  |         |                    |         |                   |         |
| MAT:rural                          |                  |                   |         | 0.40***           | 0.62***          |         |                    |         | -0.37***          |         |

42  
43

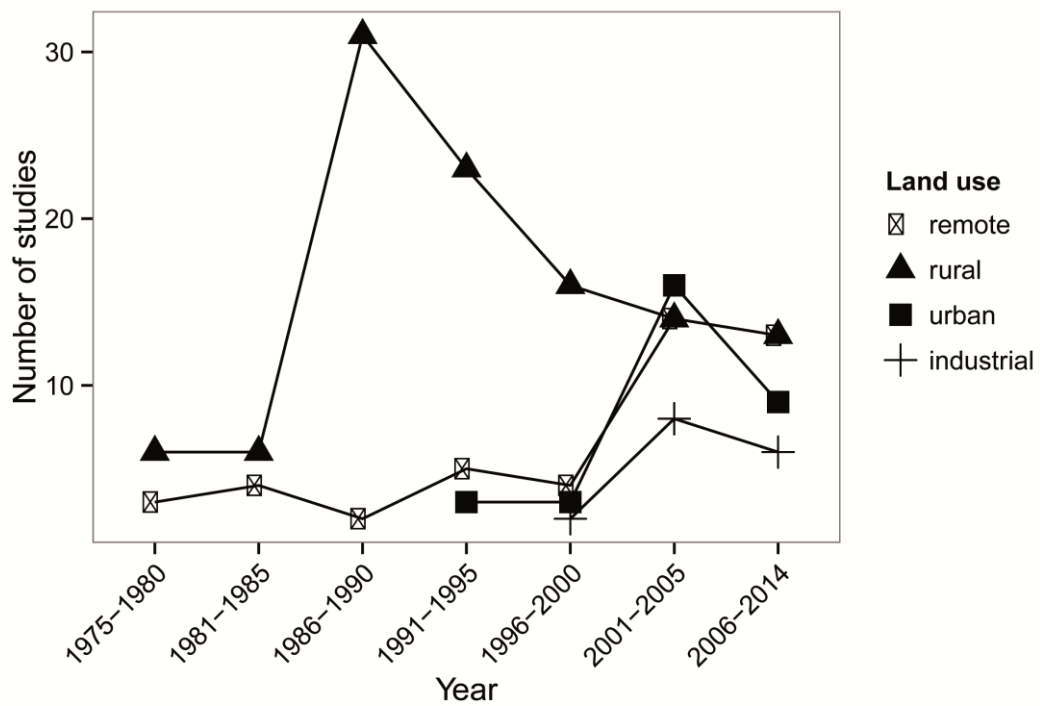

44  
45  
46

**Fig. S1. Temporal evolution of the number of studies on POPs and PAHs in vegetation at remote, rural, urban, and industrial sites.**

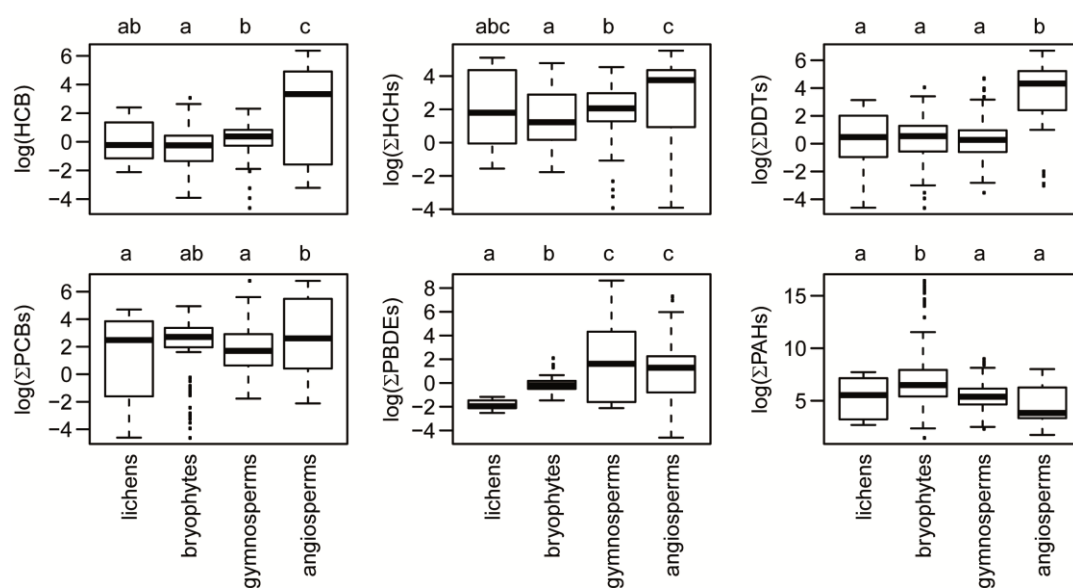

47  
48  
49  
50  
51  
52  
53  
54

**Fig. S2. Variability of the logarithm of the concentration of POPs and PAHs in each vegetation group.** Different letters indicate significant differences among groups (Tukey's HSD,  $P < 0.05$ ). Interquartile ranges (25th and 75th percentile) are shown by the height of the boxes, and the horizontal lines represent medians (50th percentile). Whiskers range from the 10th to 90th percentiles, and values outside this range are indicated by small squares. Concentrations are in  $\text{ng}\cdot\text{g}^{-1}$  dry weight.

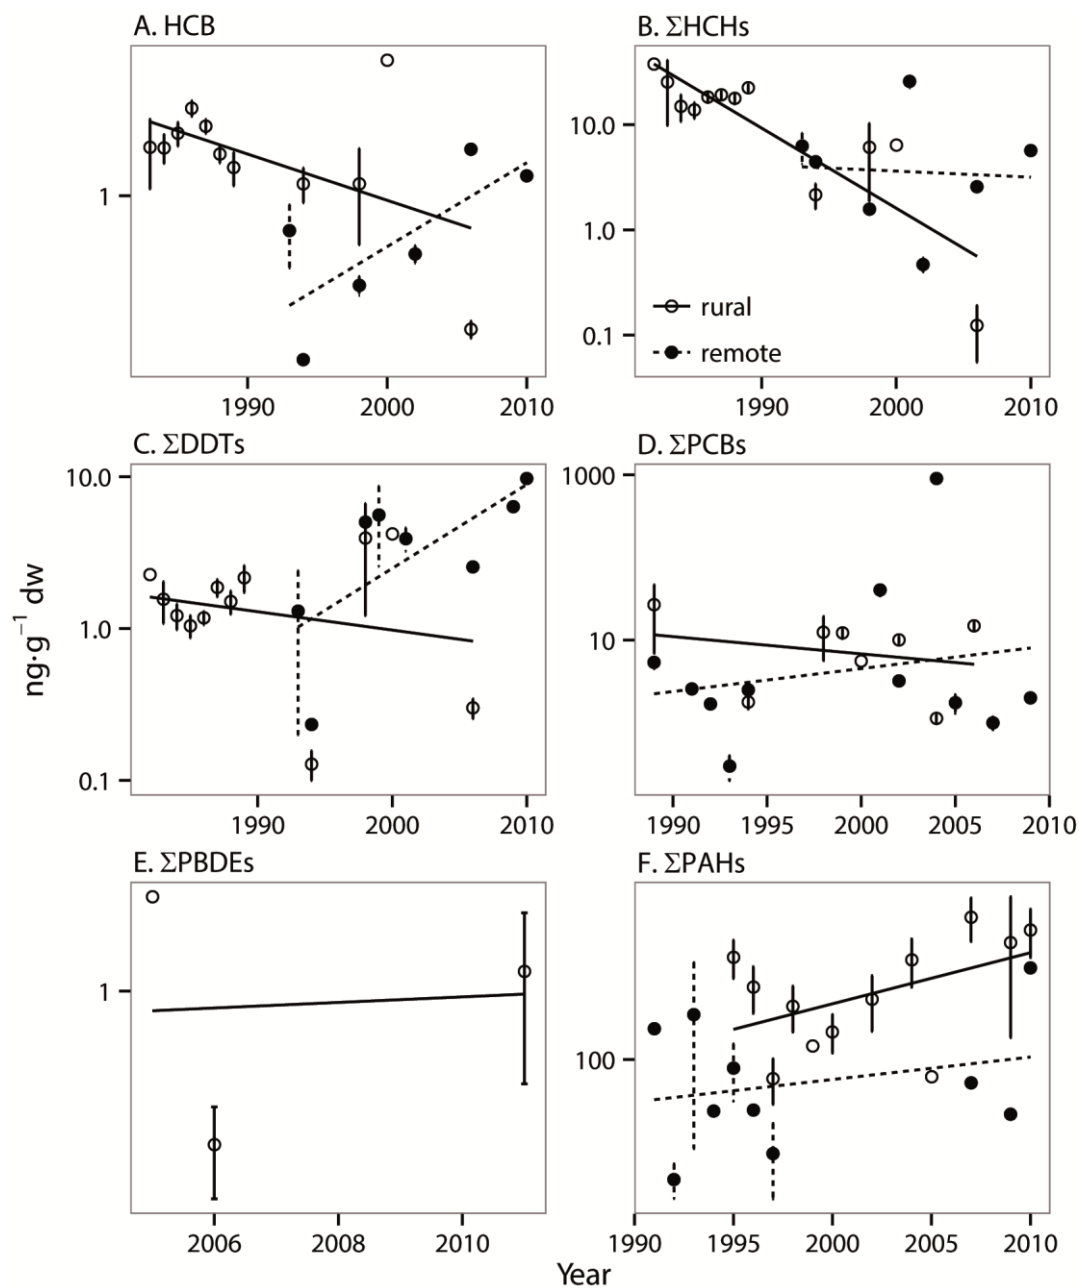

55  
 56  
 57  
 58  
 59  
 60  
 61  
 62  
 63  
 64  
 65  
 66  
 67  
 68

**Fig. S3. Individual relationships among HCB,  $\Sigma\text{HCHs}$ ,  $\Sigma\text{DDTs}$ ,  $\Sigma\text{PCBs}$ ,  $\Sigma\text{PBDEs}$ , and  $\Sigma\text{PAHs}$  ( $\text{ng}\cdot\text{g}^{-1}$  dry weight) and year in gymnosperms.** The equations for remote and rural areas are: A) HCB rural:  $y = -0.04x + 74$ ,  $r^2 = 0.12$ ,  $\text{df} = 1,303$ ,  $P < 0.0001$ , and HCB remote:  $y = 0.08x - 152$ ,  $r^2 = 0.56$ ,  $\text{df} = 1,84$ ,  $P < 0.0001$ ; B)  $\Sigma\text{HCHs}$  rural:  $y = -0.08x + 171$ ,  $r^2 = 0.33$ ,  $\text{df} = 1,306$ ,  $P < 0.0001$ , and  $\Sigma\text{HCHs}$  remote:  $y = -0.02x + 32$ ,  $r^2 = 0.02$ ,  $\text{df} = 1,101$ ,  $P = 0.1$ ; C)  $\Sigma\text{DDTs}$  rural:  $y = -0.02x + 40$ ,  $r^2 = 0.02$ ,  $\text{df} = 1,306$ ,  $P = 0.009$ , and  $\Sigma\text{DDTs}$  rural:  $y = 0.03x - 58$ ,  $r^2 = 0.10$ ,  $\text{df} = 1,104$ ,  $P < 0.001$ ; D)  $\Sigma\text{PCBs}$  rural:  $y = 0.06x - 113$ ,  $r^2 = 0.19$ ,  $\text{df} = 1,77$ ,  $P < 0.0001$ , and  $\Sigma\text{PCBs}$  remote:  $y = 0.02x - 31$ ,  $r^2 = 0.02$ ,  $\text{df} = 1,56$ ,  $P = 0.3$ ; E)  $\Sigma\text{PBDEs}$  rural:  $y = 0.05x - 98$ ,  $r^2 = 0.06$ ,  $\text{df} = 1,8$ ,  $P = 0.5$ ; and F)  $\Sigma\text{PAHs}$  rural:  $y = 0.03x - 55$ ,  $r^2 = 0.11$ ,  $\text{df} = 1,68$ ,  $P = 0.005$ , and  $\Sigma\text{PAHs}$  remote:  $y = 0.02x - 38$ ,  $r^2 = 0.14$ ,  $\text{df} = 1,15$ ,  $P = 0.1$ .



## REFERENCES

- 69  
70 1 Harner, T. & Shoeib, M. Measurements of octanol-air partition coefficients (K-OA)  
71 for polybrominated diphenyl ethers (PBDEs): Predicting partitioning in the  
72 environment. *Journal. Chem. Eng. Data.* **47**, 228-232 (2002).
- 73 2 Tittlemier, S. A., Halldorson, T., Stern, G. A. & Tomy, G. T. Vapor pressures,  
74 aqueous solubilities, and Henry's law constants of some brominated flame  
75 retardants. *Environ. Toxicol. Chem.* **21**, 1804-1810 (2002).
- 76 3 Wania, F. & Dugani, C. B. Assessing the long-range transport potential of  
77 polybrominated diphenyl ethers: A comparison of four multimedia models.  
78 *Environ. Toxicol. Chem.* **22**, 1252-1261 (2003).
- 79 4 Xiao, H., Li, N. Q. & Wania, F. Compilation, evaluation, and selection of physical-  
80 chemical property data for alpha-, beta-, and gamma-hexachlorocyclohexane.  
81 *Journal. Chem. Eng. Data.* **49**, 173-185, doi:10.1021/je034214i (2004).
- 82 5 Veltman, K. *et al.* Accumulation of organochlorines and brominated flame  
83 retardants in estuarine and marine food chains: Field measurements and model  
84 calculations. *Mar. Pollut. Bull.* **50**, 1085-1102 (2005).
- 85 6 Mackay, D., Shiu, W. Y., Ma, K. C. & Lee, S. C. *Handbook of Physical-Chemical*  
86 *Properties and Environmental Fate for Organic Chemicals, Second Edition.*  
87 (Taylor & Francis, 2006).
- 88 7 Odabasi, M., Cetin, E. & Sofuoglu, A. Determination of octanol-air partition  
89 coefficients and supercooled liquid vapor pressures of PAHs as a function of  
90 temperature: Application to gas-particle partitioning in an urban atmosphere.  
91 *Atmos. Environ.* **40**, 6615-6625, doi:10.1016/j.atmosenv.2006.05.051 (2006).
- 92 8 Daly, G. L., Lei, Y. D., Castillo, L. E., Muir, D. C. G. & Wania, F. Polycyclic  
93 aromatic hydrocarbons in Costa Rican air and soil: A tropical/temperate  
94 comparison. *Atmos. Environ.* **41**, 7339-7350, doi:10.1016/j.atmosenv.2007.05.014  
95 (2007).
- 96 9 Finizio, A., Mackay, D., Bidleman, T. & Harner, T. Octanol-air partition  
97 coefficient as a predictor of partitioning of semi-volatile organic chemicals to  
98 aerosols. *Atmos. Environ.* **31**, 2289-2296, doi:[http://dx.doi.org/10.1016/S1352-  
99 2310\(97\)00013-7](http://dx.doi.org/10.1016/S1352-2310(97)00013-7) (1997).
- 100 10 Makino, M. Prediction of n-octanol/waterpartition coefficients of polychlorinated  
101 biphenyls by use of computer calculated molecular properties. *Chemosphere* **37**,  
102 13-26, doi:[http://dx.doi.org/10.1016/S0045-6535\(98\)00034-4](http://dx.doi.org/10.1016/S0045-6535(98)00034-4) (1998).
- 103 11 Shiu, W.-Y. & Ma, K.-C. Temperature Dependence of Physical-Chemical  
104 Properties of Selected Chemicals of Environmental Interest. II. Chlorobenzenes,  
105 Polychlorinated Biphenyls, Polychlorinated Dibenzo-p-dioxins, and Dibenzofurans.  
106 *J. Phys. Chem. Ref. Data* **29**, 387-462, doi:doi:<http://dx.doi.org/10.1063/1.1286267>  
107 (2000).
- 108 12 Augusto, S., Máguas, C., Matos, J., Pereira, M. J. & Branquinho, C. Lichens as an  
109 integrating tool for monitoring PAH atmospheric deposition: A comparison with  
110 soil, air and pine needles. *Environ. Pollut.* **158**, 483-489,  
111 doi:<http://dx.doi.org/10.1016/j.envpol.2009.08.016> (2010).
- 112 13 Bacci, E. *et al.* Chlorinated hydrocarbons in lichen and moss samples from the  
113 antarctic peninsula. *Chemosphere* **15**, 747-754, doi:10.1016/0045-6535(86)90041-x  
114 (1986).
- 115 14 Blasco, M., Domeno, C., Lopez, P. & Nerin, C. Behaviour of different lichen  
116 species as biomonitors of air pollution by PAHs in natural ecosystems. *J Environ*  
117 *Monit* **13**, 2588-2596, doi:10.1039/c0em00681e (2011).

- 118 15 Cabrerizo, A., Dachs, J., Barceló, D. & Jones, K. C. Influence of Organic Matter  
119 Content and Human Activities on the Occurrence of Organic Pollutants in Antarctic  
120 Soils, Lichens, Grass, and Mosses. *Environ. Sci. Technol.* **46**, 1396-1405,  
121 doi:10.1021/es203425b (2012).
- 122 16 Calamari, D. *et al.* Role of plant biomass in the global environmental partitioning  
123 of chlorinated hydrocarbons. *Environ. Sci. Technol.* **25**, 1489-1495 (1991).
- 124 17 Carlberg, G. E., Ofstad, E. B., Drangsholt, H. & Steinnes, E. Atmospheric  
125 deposition of organic micropollutants in Norway studied by means of moss and  
126 lichen analysis. *Chemosphere* **12**, 341-356, doi:[http://dx.doi.org/10.1016/0045-  
127 6535\(83\)90109-1](http://dx.doi.org/10.1016/0045-6535(83)90109-1) (1983).
- 128 18 Cipro, C. V. *et al.* Organic pollutants and their correlation with stable isotopes in  
129 vegetation from King George Island, Antarctica. *Chemosphere* **85**, 393-398,  
130 doi:10.1016/j.chemosphere.2011.07.047 (2011).
- 131 19 Migaszewski, Z. M., Galuszka, A. & Paslawski, P. Polynuclear aromatic  
132 hydrocarbons, phenols, and trace metals in selected soil profiles and plant  
133 bioindicators in the Holy Cross Mountains, south-central Poland. *Environ Int* **28**,  
134 303-313 (2002).
- 135 20 Yang, R., Zhang, S., Li, A., Jiang, G. & Jing, C. Altitudinal and spatial signature of  
136 persistent organic pollutants in soil, lichen, conifer needles, and bark of the  
137 southeast Tibetan Plateau: implications for sources and environmental cycling.  
138 *Environ Sci Technol* **47**, 12736-12743, doi:10.1021/es403562x (2013).
- 139 21 Yogui, G. T., Sericano, J. L. & Montone, R. C. Accumulation of semivolatile  
140 organic compounds in Antarctic vegetation: A case study of polybrominated  
141 diphenyl ethers. *Sci. Total Environ.* **409**, 3902-3908,  
142 doi:<http://dx.doi.org/10.1016/j.scitotenv.2011.06.010> (2011).
- 143 22 Borghini, F., Grimalt, J. O., Sanchez-Hernandez, J. C. & Bargagli, R.  
144 Organochlorine pollutants in soils and mosses from Victoria Land (Antarctica).  
145 *Chemosphere* **58**, 271-278, doi:10.1016/j.chemosphere.2004.07.025 (2005).
- 146 23 Foan, L. *et al.* Reconstructing historical trends of polycyclic aromatic hydrocarbon  
147 deposition in a remote area of Spain using herbarium moss material. *Atmos.*  
148 *Environ.* **44**, 3207-3214, doi:<http://dx.doi.org/10.1016/j.atmosenv.2010.05.019>  
149 (2010).
- 150 24 Focardi, S., Gaggi, C., Chemello, G. & Bacci, E. Organochlorine residues in moss  
151 and lichen samples from two Antarctic areas. *Polar Record* **27**, 241-244,  
152 doi:doi:10.1017/S003224740001264X (1991).
- 153 25 Gałuszka, A. Distribution patterns of PAHs and trace elements in mosses  
154 *Hylocomium splendens* (Hedw.) B.S.G. and *Pleurozium schreberi* (Brid.) Mitt.  
155 from different forest communities: A case study, south-central Poland.  
156 *Chemosphere* **67**, 1415-1422,  
157 doi:<http://dx.doi.org/10.1016/j.chemosphere.2006.10.010> (2007).
- 158 26 Himberg, K. K. & Pakarinen, P. Atmospheric PCB deposition in Finland during  
159 1970s and 1980s on the basis of concentrations in ombrotrophic peat mosses  
160 (*Sphagnum*). *Chemosphere* **29**, 431-440, doi:[http://dx.doi.org/10.1016/0045-  
161 6535\(94\)90431-6](http://dx.doi.org/10.1016/0045-6535(94)90431-6) (1994).
- 162 27 Holoubek, I. *et al.* The use of mosses and pine needles to detect persistent organic  
163 pollutants at local and regional scales. *Environ. Pollut.* **109**, 283-292,  
164 doi:[http://dx.doi.org/10.1016/S0269-7491\(99\)00260-2](http://dx.doi.org/10.1016/S0269-7491(99)00260-2) (2000).
- 165 28 Holoubek, I., Klanova, J., Jarkovsky, J., Kubik, V. & Helesic, J. Trends in  
166 background levels of persistent organic pollutants at Kosetice observatory, Czech

- 167 Republic.2) Part II. Aquatic and terrestrial environments 1996-2005. *J Environ*  
 168 *Monit* **9**, 564-571, doi:10.1039/b701096f (2007).
- 169 29 Knulst, J., Westling, H. O. & Brorström-Lundén, E. Airborne organic  
 170 micropollutant concentrations in mosses and humus as indicators for local versus  
 171 long-range sources. *Environ. Monit. Assess.* **36**, 75-91, doi:10.1007/BF00546986  
 172 (1995).
- 173 30 Krommer, V., Zechmeister, H. G., Roder, I., Scharf, S. & Hanus-Iltnar, A.  
 174 Monitoring atmospheric pollutants in the biosphere reserve Wienerwald by a  
 175 combined approach of biomonitoring methods and technical measurements.  
 176 *Chemosphere* **67**, 1956-1966, doi:10.1016/j.chemosphere.2006.11.060 (2007).
- 177 31 Lead, W. A., Steinnes, E. & Jones, K. C. Atmospheric Deposition of PCBs to Moss  
 178 (*Hylocomium splendens*) in Norway between 1977 and 1990. *Environ. Sci.*  
 179 *Technol.* **30**, 524-530, doi:10.1021/es950275s (1996).
- 180 32 Lim, T. B., Xu, R., Tan, B. & Obbard, J. P. Persistent organic pollutants in moss as  
 181 bioindicators of atmospheric pollution in Singapore. *Chemosphere* **64**, 596-602,  
 182 doi:10.1016/j.chemosphere.2005.11.007 (2006).
- 183 33 Liu, X. *et al.* Compositional fractionation of polycyclic aromatic hydrocarbons  
 184 (PAHs) in mosses (*Hypnum plumaeformae* WILS.) from the northern slope of  
 185 Nanling Mountains, South China. *Atmos. Environ.* **39**, 5490-5499,  
 186 doi:<http://dx.doi.org/10.1016/j.atmosenv.2005.05.048> (2005).
- 187 34 Mariussen, E. *et al.* Spatial patterns of polybrominated diphenyl ethers (PBDEs) in  
 188 mosses, herbivores and a carnivore from the Norwegian terrestrial biota. *Sci. Total*  
 189 *Environ.* **404**, 162-170, doi:<http://dx.doi.org/10.1016/j.scitotenv.2008.06.005>  
 190 (2008).
- 191 35 Migaszewski, Z. M., Gałuszka, A., Crock, J. G., Lamothe, P. J. & Dołęgowska, S.  
 192 Interspecies and interregional comparisons of the chemistry of PAHs and trace  
 193 elements in mosses *Hylocomium splendens* (Hedw.) B.S.G. and *Pleurozium*  
 194 *schreberi* (Brid.) Mitt. from Poland and Alaska. *Atmos. Environ.* **43**, 1464-1473,  
 195 doi:<http://dx.doi.org/10.1016/j.atmosenv.2008.11.035> (2009).
- 196 36 Tarcau, D., Cucu-Man, S., Boruvkova, J., Klanova, J. & Covaci, A. Organochlorine  
 197 pesticides in soil, moss and tree-bark from North-Eastern Romania. *Sci. Total*  
 198 *Environ.* **456-457**, 317-324, doi:<http://dx.doi.org/10.1016/j.scitotenv.2013.03.103>  
 199 (2013).
- 200 37 Wang, Q. *et al.* Determination of dioxin-like polychlorinated biphenyls in soil and  
 201 moss from Fildes Peninsula, Antarctica. *Chin. Sci. Bull.* **57**, 992-996,  
 202 doi:10.1007/s11434-011-4969-y (2012).
- 203 38 Zechmeister, H. G. *et al.* Pilot study on road traffic emissions (PAHs, heavy  
 204 metals) measured by using mosses in a tunnel experiment in Vienna, Austria.  
 205 *Environ Sci Pollut Res Int* **13**, 398-405 (2006).
- 206 39 Godzik, B., Szarek-Łukaszewska, G., Kapusta, P. & Stępień, K. PAHs  
 207 Concentrations in Poland Using Moss *Pleurozium Schreberi* as Bioindicator. *pbj*  
 208 **59**, 137, doi:10.2478/pbj-2014-0019 (2014).
- 209 40 Chen, J., Zhao, H., Gao, L., Henkelmann, B. & Schramm, K. W. Atmospheric  
 210 PCDD/F and PCB levels implicated by pine (*Cedrus deodara*) needles at Dalian,  
 211 China. *Environ Pollut* **144**, 510-515, doi:10.1016/j.envpol.2006.01.039 (2006).
- 212 41 Sajwan, K. S., Senthil Kumar, K., Kelley, S. & Loganathan, B. G. Deposition of  
 213 organochlorine pesticides, PCBs (Aroclor 1268), and PBDEs in selected plant  
 214 species from a Superfund Site at Brunswick, Georgia, USA. *Bull Environ Contam*  
 215 *Toxicol* **82**, 444-449, doi:10.1007/s00128-009-9646-3 (2009).

- 216 42 Yang, R. Q., Yao, T. D., Xu, B. Q., Jiang, G. B. & Zheng, X. Y. Distribution of  
 217 organochlorine pesticides (OCPs) in conifer needles in the southeast Tibetan  
 218 Plateau. *Environ. Pollut.* **153**, 92-100, doi:10.1016/j.envpol.2007.07.033 (2008).
- 219 43 Nizzetto, L. *et al.* Accumulation parameters and seasonal trends for PCBs in  
 220 temperate and boreal forest plant species. *Environ. Sci. Technol.* **42**, 5911-5916,  
 221 doi:10.1021/es800217m (2008).
- 222 44 Nizzetto, L. *et al.* Accumulation of Persistent Organic Pollutants in Canopies of  
 223 Different Forest Types: Role of Species Composition and Altitudinal-Temperature  
 224 Gradient. *Environ. Sci. Technol.* **40**, 6580-6586, doi:10.1021/es0605523 (2006).
- 225 45 Grimalt, J. O. & van Drooge, B. L. Polychlorinated biphenyls in mountain pine  
 226 (*Pinus uncinata*) needles from Central Pyrenean high mountains (Catalonia, Spain).  
 227 *Ecotoxicol Environ Saf* **63**, 61-67, doi:10.1016/j.ecoenv.2005.06.005 (2006).
- 228 46 Hanari, N. *et al.* Dioxin-like compounds in pine needles around Tokyo Bay, Japan  
 229 in 1999. *J. Environ. Monit.* **6**, 305-312, doi:10.1039/b311176h (2004).
- 230 47 Hellström, A., Kylin, H., Strachan, W. M. J. & Jensen, S. Distribution of some  
 231 organochlorine compounds in pine needles from Central and Northern Europe.  
 232 *Environ. Pollut.* **128**, 29-48, doi:<http://dx.doi.org/10.1016/j.envpol.2003.08.033>  
 233 (2004).
- 234 48 Hwang, H.-M., Wade, T. L. & Sericano, J. L. Concentrations and source  
 235 characterization of polycyclic aromatic hydrocarbons in pine needles from Korea,  
 236 Mexico, and United States. *Atmos. Environ.* **37**, 2259-2267,  
 237 doi:[http://dx.doi.org/10.1016/S1352-2310\(03\)00090-6](http://dx.doi.org/10.1016/S1352-2310(03)00090-6) (2003).
- 238 49 Kannan, N., Hong, S., Yim, U. & Shim, W. Biomonitoring background levels of  
 239 PCBs and PBDEs in Seoul metropolitan atmosphere for possible health effects.  
 240 *Toxicol. Environ. Health. Sci.* **1**, 109-116, doi:10.1007/BF03216471 (2009).
- 241 50 Kim, B.-H., Lee, S.-J., Mun, S.-J. & Chang, Y.-S. A case study of dioxin  
 242 monitoring in and around an industrial waste incinerator in Korea. *Chemosphere*  
 243 **58**, 1589-1599, doi:<http://dx.doi.org/10.1016/j.chemosphere.2004.10.041> (2005).
- 244 51 Kozul, D. & Romanic, S. H. Distribution of organochlorine compounds in pine  
 245 needles collected in Zagreb. *Bull Environ Contam Toxicol* **81**, 339-342,  
 246 doi:10.1007/s00128-008-9476-8 (2008).
- 247 52 Kylin, H., Grimvall, E. & Ostman, C. Environmental monitoring of  
 248 polychlorinated-biphenyls using pine needles as passive samplers. *Environ. Sci.*  
 249 *Technol.* **28**, 1320-1324, doi:10.1021/es00056a021 (1994).
- 250 53 Kylin, H., Hellström, A., Nordstrand, E. & Zaid, A. Organochlorine pollutants in  
 251 Scots pine needles—biological and site related variation within a forest stand.  
 252 *Chemosphere* **51**, 669-675, doi:[http://dx.doi.org/10.1016/S0045-6535\(03\)00101-2](http://dx.doi.org/10.1016/S0045-6535(03)00101-2)  
 253 (2003).
- 254 54 Lehndorff, E. & Schwark, L. Biomonitoring airborne parent and alkylated three-  
 255 ring PAHs in the Greater Cologne Conurbation I: Temporal accumulation patterns.  
 256 *Environ. Pollut.* **157**, 1323-1331, doi:10.1016/j.envpol.2008.11.037 (2009).
- 257 55 Lehndorff, E. & Schwark, L. Biomonitoring of air quality in the Cologne  
 258 Conurbation using pine needles as a passive sampler—Part II: polycyclic aromatic  
 259 hydrocarbons (PAH). *Atmos. Environ.* **38**, 3793-3808,  
 260 doi:<http://dx.doi.org/10.1016/j.atmosenv.2004.03.065> (2004).
- 261 56 Loganathan, B. G., Seaford, K. D., Owen, D. A., Kumar, K. S. & Sajwan, K. S.  
 262 Accumulation of Polychlorinated Biphenyls in Pine Needles Collected from  
 263 Residential and Industrial Areas in Western Kentucky. *J. Ky. Acad. Sci.* **68**, 37-49,  
 264 doi:10.3101/1098-7096(2007)68[37:AOPBIP]2.0.CO;2 (2007).

- 265 57 Moeckel, C., Nizzetto, L., Strandberg, B., Lindroth, A. & Jones, K. C. Air-Boreal  
 266 Forest Transfer and Processing of Polychlorinated Biphenyls. *Environ. Sci.*  
 267 *Technol.* **43**, 5282-5289, doi:10.1021/es803505u (2009).
- 268 58 Ockenden, W. A., Steinnes, E., Parker, C. & Jones, K. C. Observations on  
 269 persistent organic pollutants in plants: Implications for their use as passive air  
 270 samplers and for POP cycling. *Environ. Sci. Technol.* **32**, 2721-2726,  
 271 doi:10.1021/es980150y (1998).
- 272 59 Ok, G. *et al.* Monitoring of air pollution by polychlorinated dibenzo-p-dioxins and  
 273 polychlorinated dibenzofurans of pine needles in Korea. *Chemosphere* **46**, 1351-  
 274 1357, doi:[http://dx.doi.org/10.1016/S0045-6535\(01\)00261-2](http://dx.doi.org/10.1016/S0045-6535(01)00261-2) (2002).
- 275 60 Piccardo, M. T. *et al.* Pinus nigra and Pinus pinaster needles as passive samplers of  
 276 polycyclic aromatic hydrocarbons. *Environ. Pollut.* **133**, 293-301,  
 277 doi:10.1016/j.envpol.2004.05.034 (2005).
- 278 61 Rappolder, M., Schroeter-Kermani, C., Schaedel, S., Waller, U. & Koerner, W.  
 279 Temporal trends and spatial distribution of PCDD, PCDF, and PCB in pine and  
 280 spruce shoots. *Chemosphere* **67**, 1887-1896,  
 281 doi:10.1016/j.chemosphere.2006.05.079 (2007).
- 282 62 Ratola, N., Amigo, J. & Alves, A. Levels and Sources of PAHs in Selected Sites  
 283 from Portugal: Biomonitoring with Pinus pinea and Pinus pinaster Needles. *Arch.*  
 284 *Environ. Contam. Toxicol.* **58**, 631-647, doi:10.1007/s00244-009-9462-0 (2010).
- 285 63 Ratola, N., Alves, A., Santos, L. & Lacorte, S. Pine needles as passive bio-samplers  
 286 to determine polybrominated diphenyl ethers. *Chemosphere* **85**, 247-252,  
 287 doi:10.1016/j.chemosphere.2011.06.005 (2011).
- 288 64 Romanic, S. H. & Krauthacker, B. Distribution of persistent organochlorine  
 289 compounds in one-year and two-year-old pine needles. *Bull. Environ. Contam.*  
 290 *Toxicol.* **77**, 143-148, doi:10.1007/s00128-006-1043-6 (2006).
- 291 65 Romanic, S. H. & Krauthacker, B. Are pine needles bioindicators of air pollution?  
 292 Comparison of organochlorine compound levels in pine needles and ambient air.  
 293 *Arh Hig Rada Toksikol* **58**, 195-199, doi:10.2478/v10004-007-0012-8 (2007).
- 294 66 Salamova, A. & Hites, R. A. Brominated and Chlorinated Flame Retardants in Tree  
 295 Bark from Around the Globe. *Environ. Sci. Technol.* **47**, 349-354,  
 296 doi:10.1021/es303393z (2012).
- 297 67 Simonich, S. L. & Hites, R. A. Importance of vegetation in removing polycyclic  
 298 aromatic hydrocarbons from the atmosphere. *Nature* **370**, 49-51 (1994).
- 299 68 Tian, M. *et al.* Plant Uptake of Atmospheric Brominated Flame Retardants at an E-  
 300 Waste Site in Southern China. *Environ. Sci. Technol.* **46**, 2708-2714,  
 301 doi:10.1021/es203669n (2012).
- 302 69 Tomashuk, T. A., Truong, T. M., Mantha, M. & McGowin, A. E. Atmospheric  
 303 polycyclic aromatic hydrocarbon profiles and sources in pine needles and  
 304 particulate matter in Dayton, Ohio, USA. *Atmos. Environ.* **51**, 196-202,  
 305 doi:<http://dx.doi.org/10.1016/j.atmosenv.2012.01.028> (2012).
- 306 70 Tremolada, P., Burnett, V., Calamari, D. & Jones, K. C. A study of the spatial  
 307 distribution of PCBs in the UK atmosphere using pine needles. *Chemosphere* **32**,  
 308 2189-2203, doi:[http://dx.doi.org/10.1016/0045-6535\(96\)00127-0](http://dx.doi.org/10.1016/0045-6535(96)00127-0) (1996).
- 309 71 Villa, S., Finizio, A., Diaz Diaz, R. & Vighi, M. Distribution of Organochlorine  
 310 Pesticides in Pine Needles of an Oceanic Island: The Case of Tenerife (Canary  
 311 Islands, Spain). *Water, Air, and Soil Pollution* **146**, 335-349,  
 312 doi:10.1023/A:1023906306701 (2003).

- 313 72 Wagrowski, D. M. & Hites, R. A. Polycyclic Aromatic Hydrocarbon Accumulation  
314 in Urban, Suburban, and Rural Vegetation. *Environ. Sci. Technol.* **31**, 279-282,  
315 doi:10.1021/es960419i (1996).
- 316 73 Wenzel, K. D. *et al.* Immission patterns of airborne pollutants in Argentina and  
317 Germany .2. Biomonitoring of organochlorine compounds and polycyclic  
318 aromatics. *Chemosphere* **34**, 2505-2518, doi:10.1016/s0045-6535(97)00096-9  
319 (1997).
- 320 74 de Wit, C. A., Alae, M. & Muir, D. C. Levels and trends of brominated flame  
321 retardants in the Arctic. *Chemosphere* **64**, 209-233,  
322 doi:10.1016/j.chemosphere.2005.12.029 (2006).
- 323 75 Wyrzykowska, B. *et al.* Source determination of highly chlorinated biphenyl  
324 isomers in pine needles – Comparison to several PCB preparations. *Environ. Pollut.*  
325 **143**, 46-59, doi:<http://dx.doi.org/10.1016/j.envpol.2005.11.018> (2006).
- 326 76 Wyrzykowska, B. *et al.* Polychlorinated biphenyls and -naphthalenes in pine  
327 needles and soil from Poland - Concentrations and patterns in view of long-term  
328 environmental monitoring. *Chemosphere* **67**, 1877-1886,  
329 doi:10.1016/j.chemosphere.2006.05.078 (2007).
- 330 77 Xu, D., Zhong, W., Deng, L., Chai, Z. & Mao, X. Levels of extractable  
331 organohalogens in pine needles in China. *Environ Sci Technol* **37**, 1-6 (2003).
- 332 78 Xu, D., Deng, L., Chai, Z. & Mao, X. Organohalogenated compounds in pine  
333 needles from Beijing city, China. *Chemosphere* **57**, 1343-1353,  
334 doi:10.1016/j.chemosphere.2004.09.016 (2004).
- 335 79 Zhu & Hites, R. A. Brominated Flame Retardants in Tree Bark from North  
336 America. *Environ. Sci. Technol.* **40**, 3711-3716, doi:10.1021/es060225v (2006).
- 337 80 Brorstrom-Lunden, E. & Lofgren, C. Atmospheric fluxes of persistent semivolatile  
338 organic pollutants to a forest ecological system at the Swedish west coast and  
339 accumulation in spruce needles. *Environ. Pollut.* **102**, 139-149, doi:10.1016/s0269-  
340 7491(98)00081-5 (1998).
- 341 81 Di Guardo, A. *et al.* Conifer needles as passive biomonitors of the spatial and  
342 temporal distribution of DDT from a point source. *Chemosphere* **52**, 789-797,  
343 doi:10.1016/s0045-6535(03)00256-x (2003).
- 344 82 Offenthaler, I. *et al.* PCDD/F and PCB in spruce forests of the Alps. *Environ.*  
345 *Pollut.* **157**, 3280-3289, doi:<http://dx.doi.org/10.1016/j.envpol.2009.05.052> (2009).
- 346 83 St-Amand, A. D., Mayer, P. M. & Blais, J. M. Seasonal trends in vegetation and  
347 atmospheric concentrations of PAHs and PBDEs near a sanitary landfill. *Atmos.*  
348 *Environ.* **42**, 2948-2958, doi:<http://dx.doi.org/10.1016/j.atmosenv.2007.12.050>  
349 (2008).
- 350 84 Weiss, P., Lorbeer, G. & Scharf, S. Regional aspects and statistical characterisation  
351 of the load with semivolatile organic compounds at remote Austrian forest sites.  
352 *Chemosphere* **40**, 1159-1171, doi:[http://dx.doi.org/10.1016/S0045-6535\(99\)00365-](http://dx.doi.org/10.1016/S0045-6535(99)00365-3)  
353 [3](http://dx.doi.org/10.1016/S0045-6535(99)00365-3) (2000).
- 354 85 Howsam, M., Jones, K. C. & Ineson, P. PAHs associated with the leaves of three  
355 deciduous tree species. I — Concentrations and profiles. *Environ. Pollut.* **108**, 413-  
356 424, doi:[http://dx.doi.org/10.1016/S0269-7491\(99\)00195-5](http://dx.doi.org/10.1016/S0269-7491(99)00195-5) (2000).
- 357 86 Ma, J. *et al.* Polybrominated dibenzo-p-dioxins/ dibenzofurans and polybrominated  
358 diphenyl ethers in soil, vegetation, workshop-floor dust, and electronic shredder  
359 residue from an electronic waste recycling facility and in soils from a chemical  
360 industrial complex in eastern China. *Environ Sci Technol* **43**, 7350-7356 (2009).

361 87 Zhao, Y. X. *et al.* Diffusion of polybrominated diphenyl ether (PBDE) from an e-  
362 waste recycling area to the surrounding regions in Southeast China. *Chemosphere*  
363 **76**, 1470-1476, doi:10.1016/j.chemosphere.2009.07.023 (2009).  
364 88 Hassanin, A., Johnston, A. E., Thomas, G. O. & Jones, K. C. Time Trends of  
365 Atmospheric PBDEs Inferred from Archived U.K. Herbage. *Environ. Sci. Technol.*  
366 **39**, 2436-2441, doi:10.1021/es0486162 (2005).  
367 89 Parolini, M., Guazzoni, N., Binelli, A. & Tremolada, P. Polybrominated Diphenyl  
368 Ether Contamination in Soil, Vegetation, and Cow Milk From a High-Mountain  
369 Pasture in the Italian Alps. *Arch. Environ. Contam. Toxicol.* **63**, 29-44,  
370 doi:10.1007/s00244-012-9753-8 (2012).  
371 90 Gari, M., Bosch, C., Grimalt, J. O. & Sunyer, J. Impacts of atmospheric chlor-alkali  
372 factory emissions in surrounding populations. *Environ Int* **65**, 1-8,  
373 doi:10.1016/j.envint.2013.12.008 (2014).

374
